# Supplementary material
Source: PubMed Central journal article supplement (PMC3069691)
Supplement: NIHMS258366-supplement-1.pdf [file NIHMS258366-supplement-1.pdf]

## Supplement Figure 1

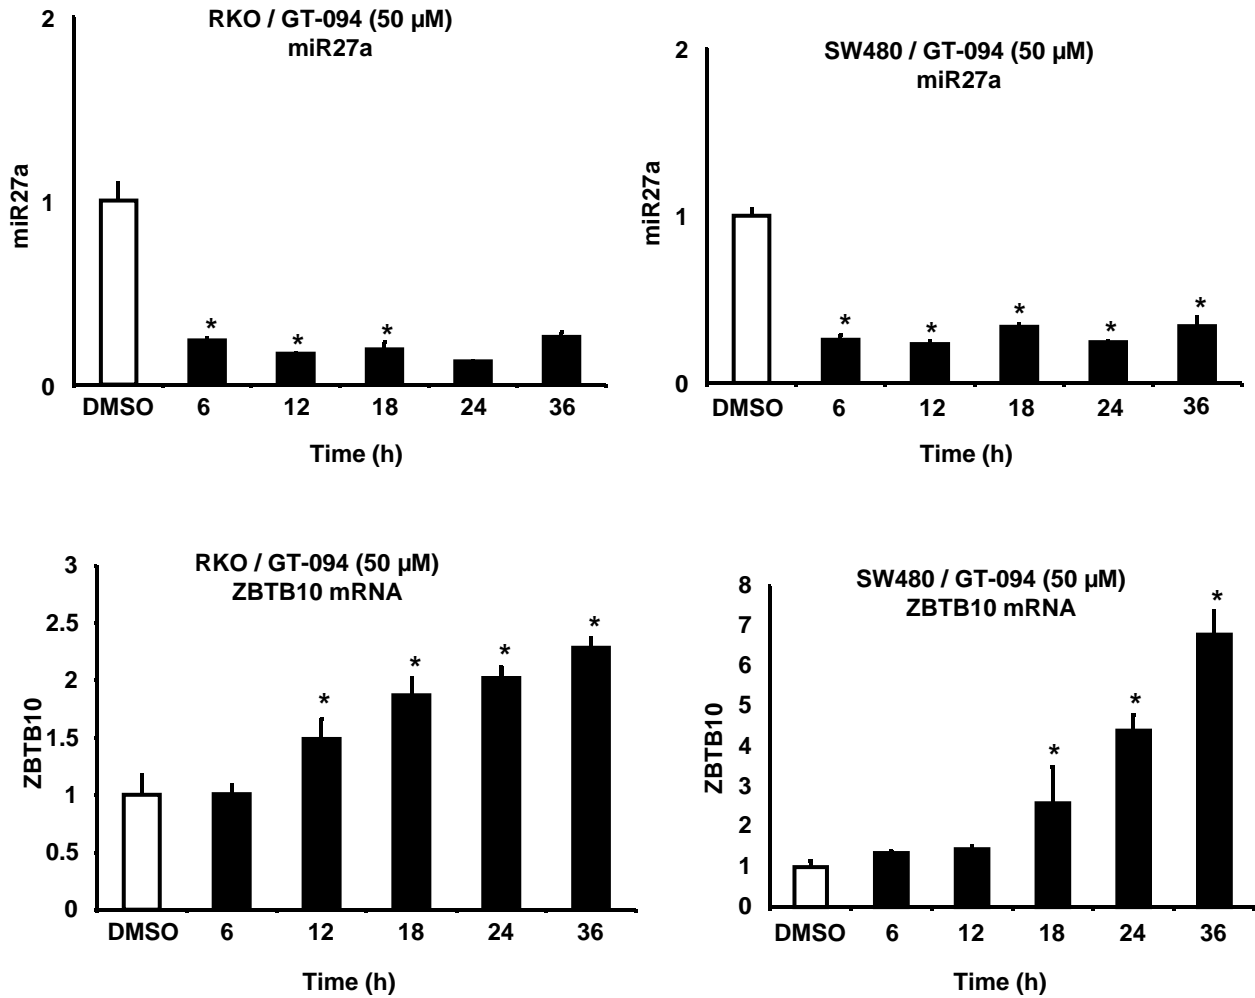

**Supplemental Figure 1.** Time course effects of GT-094 on miR-27a (A) and ZBTB10 (B). RKO and SW480 cells were treated with DMSO or GT-094 for 6, 12, 18, 24 and 36 h, and expression of miR-27a and ZBTB10 was determined by real time PCR as outlined in the Materials and Methods. Results are mean  $\pm$  SE for replicate (3) experiments, and significant ( $p < 0.05$ ) inhibition/induction is indicated (\*).
